# Maternal Odor Reduces the Neural Response to Fearful Faces in Human Infants

Sarah Jessen

Department of Neurology, University of Lübeck, Lübeck, Germany

Short title: Maternal Odor and Fear Perception in Infancy

Sarah Jessen, Department of Neurology, University of Lübeck, Ratzeburger Allee  
160, 23562 Lübeck, Germany

Email: [sarah.jessen@neuro.uni-luebeck.de](mailto:sarah.jessen@neuro.uni-luebeck.de)

Phone: +49 451 3101 7449

# ABSTRACT

1 Maternal odor is known to play an important role in mother-infant-interaction in  
 2 many altricial species such as rodents. However, we only know very little about  
 3 its role in early human development. The present study therefore investigated the  
 4 impact of maternal odor on infant brain responses to emotional expression. We  
 5 recorded the electroencephalographic (EEG) signal of seven-month-old infants  
 6 watching happy and fearful faces. Infants in two control groups exposed to no  
 7 specific odor (control 1) or the odor of a different infant's mother (control 2)  
 8 showed the expected EEG fear response. Crucially, this response was markedly  
 9 absent in the experimental group exposed to their mother's odor. Thus, infants  
 10 respond differently to fear signals in the presence of maternal odor. Our data  
 11 therefore suggest that maternal odor can be a strong modulator of social  
 12 perception in human infants.

13 Keywords: infancy, facial expression, odor, breastfeeding, fear processing, EEG

14

15

# 16 INTRODUCTION

17 As members of an altricial species, newborn humans completely rely on their  
18 social environment for survival. To foster and support the care they receive,  
19 newborns show a number of mechanisms to support social bonding, including a  
20 strong preference for faces (Johnson, Dziurawiec, Ellis, & Morton, 1991) and their  
21 mother's voice (DeCasper & Fifer, 1980). However, face and voice are not the only  
22 sources of social information, and prior work suggests that olfaction and especially  
23 maternal odor can play an important role in early social development (Lubke &  
24 Pause, 2015).

25 One area in which the role of maternal odor has been amply investigated is  
26 breastfeeding. Human neonates respond to the smell of breast milk within days  
27 after birth (Doucet, Soussignan, Sagot, & Schaal, 2007; Marlier & Schaal, 2005;  
28 Porter, Makin, Davis, & Christensen, 1992), they prefer their mother's unwashed  
29 over their mother's washed breast (Varendi, Porter, & Winberg, 1994), and they  
30 quickly develop a preference for their own mother's breast milk (Russell, 1976).  
31 Interestingly, maternal odor not only appears to facilitate nursing, but also seems  
32 to have a regulatory influence on other aspects of a neonate's life. Maternal odor  
33 can have a soothing effect on crying infants (Sullivan & Toubas, 1998) and appears  
34 to reduce the pain response during medical procedures such as heel sticks  
35 (Nishitani et al., 2009; Zhang, Su, Li, & Chen, 2018).

36 Over the course of infancy, maternal odor can furthermore impact cognitive and  
37 perceptual processes. Importantly, the presence of maternal odor has been shown  
38 to impact face processing (Durand, Baudouin, Lewkowicz, Goubet, & Schaal, 2013;  
39 Durand, Schaal, Goubet, Lewkowicz, & Baudouin, 2020). Four-month-old infants  
40 tend to look longer at faces, and in particular the eye region of faces, in the presence  
41 of maternal odor (Durand et al., 2013). In a recent study, Leleu and colleagues  
42 (Leleu et al., 2019) furthermore investigated the influence of maternal odor on the  
43 neural response to faces in 4-month-old infants, and found an enhanced face-  
44 related neural response in the presence of maternal odor. In sum, maternal odor  
45 therefore appears to impact face processing in infancy both on a neural and a  
46 behavioral level. Interestingly, this effect appears to be specific to facial (or

potentially social) information, as no comparable effect was found for non-social control stimuli (Durand et al., 2013). Furthermore, maternal odor also influences infants' looking behavior to familiar compared to unfamiliar faces (Durand et al., 2020), suggesting that maternal odor not only modulates the response to faces *per se*, but also influences the processing of facial information.

However, facial identity is not the only information infants (and adults) can glean from faces; another prominent type of information that can be extracted from facial information is someone's emotional state. The processing of emotional expressions has been amply investigated in human infants, and one prominent finding is that by about 7 months of age, infants discriminate between different emotional facial expression (for review, see Grossmann, 2010; Leppänen & Nelson, 2009, 2012). In particular, infants start to show an attentional bias towards fearful expressions (Vaish, Grossmann, & Woodward, 2008), which can be seen both on a neural (Leppänen, Moulson, Vogel-Farley, & Nelson, 2007; Peltola, Leppänen, Mäki, & Hietanen, 2009) and a behavioral level (Leppänen et al., 2007; Miguel, McCormick, Westerlund, & Nelson, 2019; Peltola, Hietanen, Forssman, & Leppänen, 2013). At the same time, recent work suggests that this fear bias can be strongly influenced by secondary factors, such as infant temperament (Martinos, Matheson, & de Haan, 2012) and breastfeeding experience (Krol, Rajhans, Missana, & Grossmann, 2014).

Importantly, these factors are linked to the interplay between the infant and their social environment, providing initial evidence for a modulation by social factors. However, at the same time, all the above-mentioned components (infant temperament, breastfeeding experience) are often interpreted as stable factors relating to interindividual differences rather than factors that flexibly change in a particular situation. Maternal odor in contrast is a situation-dependent signal that can either be present or absent in a given setting. It is therefore unclear whether a situation-dependent factor such as maternal odor can also impact infants' response to fear signals.

To address this question, we designed an experiment to investigate the impact of maternal odor on the neural response to fear signals in human infants. In an electroencephalographic (EEG) set-up, infants were presented with happy and

fearful facial expressions while they were exposed to either the familiar maternal odor, to an unfamiliar mother's odor, or to no specific odor at all. To quantify infants' response to fear signals, we investigated the amplitude of the *Nc*, an infant event-related potential (ERP) component observed between 400 and 800 ms after the onset of a stimulus at frontocentral electrodes. The *Nc* amplitude has been linked to the allocation of attention (Conte, Richards, Guy, Xie, & Roberts, 2020; Riggins & Scott, 2019; Webb, Long, & Nelson, 2005) and is typically enhanced in response to fearful faces in 7-month-old infants (Peltola et al., 2009).

Since prior studies suggest that long-term social factors such as extended breastfeeding experience can be associated with bias towards positive rather than negative facial expressions (Krol et al., 2014), we expect a reduction in the infant fear response by short-term social factors such as the mother's presence, even if this presence is only signaled via maternal odor. In contrast, we predict that infants show the typical increased response to fearful faces in the absence of their mother's odor.

## METHODS

*Participants.* Seventy-six 7-month-old infants were included in the final sample (age:  $213 \pm 8$  days [mean  $\pm$  standard deviation (SD)]; range: 200-225 days; 38 female, see Table 1 for description of the individual groups). An additional 15 infants had been tested but were not included in the final sample because they did not provide at least 10 artifact-free trials per condition ( $n=11$ ); had potential neurological problems ( $n=1$ ); were erroneously invited too young ( $n=1$ ); the mean ERP response in the time-window and electrodes of interest was more than 4 standard deviations from the mean ( $n=1$ , see below); or because of technical problems during the recording ( $n=1$ ).

The sample size was determined by statistical considerations and practical conventions in the field. First, for practical considerations and the known high attrition rates in infant EEG studies, we had planned a priori to keep collecting data until 25 useable data sets per each of the three experimental manipulation groups were obtained. Second, as outlined in Albers & Lakens (2018), a smallest effect size of interest was critical here, as too small true effects sizes for odor

manipulations would not be of practical or translational relevance. In the present study, a total sample size of  $n=75$  in three groups, was thus powered with 80% or more to detect medium and large effects (i.e., Cohen's  $d$  of 0.8 or larger) at a conventional type I error level of 5 %.

Infants were recruited via the maternity ward at the local University hospital (Universitätsklinikum Schleswig-Holstein), were born full-term (38–42 weeks gestational age), had a birth weight of at least 2500 g, and had no known neurological deficits. The study was conducted according to the Declaration of Helsinki, approved by the ethics committee at the University of Lübeck, and parents provided written informed consent.

*Table 1. Overview of participants included in the final analysis. An additional 15 infants were tested but not included in the final analysis for various reasons (see text).*

|               | N  | female | age<br>(in days)* | still<br>breastfed | trials<br>(happy)* | trials<br>(fearful)* | Inf Neg<br>Temp** | EPDS**      |
|---------------|----|--------|-------------------|--------------------|--------------------|----------------------|-------------------|-------------|
| Maternal odor | 25 | 13     | 213 ± 7           | 14                 | 38 ± 18            | 38 ± 17              | 3.03 ± 0.68       | 4.32 ± 3.74 |
| No odor       | 26 | 9      | 214 ± 8           | 18                 | 45 ± 21            | 45 ± 23              | 3.34 ± 0.68       | 5.08 ± 4.77 |
| Stranger odor | 25 | 16     | 215 ± 7           | 13                 | 37 ± 18            | 37 ± 17              | 3.25 ± 0.76       | 4.54 ± 3.96 |

\* mean ± standard deviation; \* excluding one participant in the Stranger odor group, who did not fill in the questionnaire; Inf Neg Temp = Infant Negative Temperament, see text; EPDS = Edinburgh Postpartum Depression Screening, see text

*Stimulus.* As emotional face stimuli, we used colored photographs of happy and fearful facial expressions by 6 actresses from the FACES database (Ebner, Riediger, & Lindenberger, 2010 [actress-ID 54, 63, 85, 90, 115, 173]). Photographs were cropped so that only the face was visible in an oval shape, and have successfully been used in prior studies to investigate processing of emotional faces in infancy (Jessen & Grossmann, 2015, 2017).

*Odor manipulation.* Prior to a scheduled experimental recording, all infants' mothers were given a white cotton t-shirt and instructed to wear this t-shirt for three nights in a row. The mother was asked to store the t-shirt in a provided zip-lock bag during the day, and use her normal shampoo, soap, deodorant etc. as usual but refrain from using new products. Before the t-shirt was given to the mother, it had been washed with the same detergent for all t-shirts.

135 For practical reasons, the t-shirts used in the *Stranger odor* group had to be stored  
 136 in a freezer (-20 °C) in the laboratory to allow swapping them between different  
 137 mother-infant-dyads. This was done since freezing has been shown to conserve  
 138 odor (Lenochova, Roberts, & Havlicek, 2009). To furthermore avoid any potential  
 139 confound due to freezing, we asked *all* mothers, irrespective of later group  
 140 assignment, to store the t-shirt in their freezer at home in a zip-lock bag for at least  
 141 one night after wearing the t-shirt for three nights. In the *Maternal odor* group, in  
 142 three cases, this was not possible as the t-shirt only arrived three days prior to the  
 143 appointment, and in two cases the mother did not report whether the t-shirt had  
 144 been stored in the freezer. For the remaining 20 infants in the *Maternal odor* group,  
 145 the t-shirt had been stored in the freezer for at least one night. In the *No odor* group,  
 146 t-shirts were unworn and hence freezing was irrelevant for odor emission (but  
 147 mothers followed the same instructions to preserve blindness to condition  
 148 assignment). In the *Stranger odor* group, all t-shirts except one had been stored in  
 149 the freezer for at least one night.

150 *Randomization.* Infants were randomly assigned to either the *Maternal odor* group  
 151 or one of the control groups (*No odor* group or *Stranger odor* group; Figure 1). As  
 152 only constraint to fully random assignment, we monitored as the study proceeded  
 153 that groups did not differ in gender, age, or breastfeeding experience. Infants in  
 154 the *Maternal odor* group were administered the t-shirt previously worn by their  
 155 mother during the experiment. Infants in the *No odor* group were administered an  
 156 unworn t-shirt. Infants in the *Stranger odor* group were administered a t-shirt  
 157 previously worn by the mother of one of the other infants. The t-shirt of their own  
 158 mother was stored in a freezer to be used as a stimulus for a different infant in the  
 159 *Stranger odor* group. Except in one case, both, parents and the experimenter  
 160 administering the t-shirt, were blind to the group assignment.

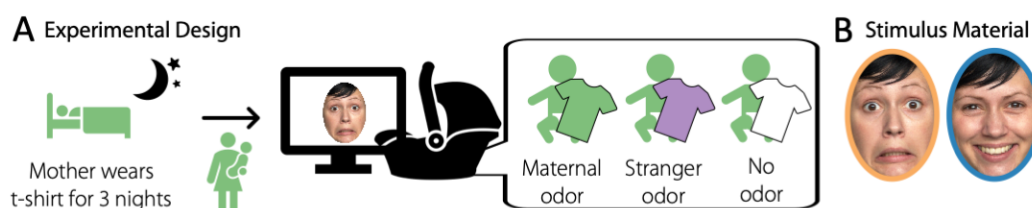

**Figure 1. Experimental design.** A) Mothers were asked to wear a provided t-shirt for 3 nights in a row prior to the experiment. The infant was randomly assigned to one of three groups; a Maternal odor group (exposed to the t-shirt worn by the infant's mother), a Stranger odor group (exposed to a t-shirt worn by a different infant's mother), or a No odor group (exposed to an unworn t-shirt). We recorded the EEG signal while the infants were seated in a car seat with the t-shirt positioned over their chest area and watched happy and fearful facial expressions. B) Example of fearful and happy faces used as stimulus material, the colored circles are for illustration purpose only and correspond to the color coding used in the following figures.

**Procedure and experimental design.** Before the laboratory visit, families were sent the t-shirt (as described above) as well as a set of questionnaires, in particular the EPDS (Cox, Holden, & Sagovsky, 1987), the IBQ-R (Gartstein & Rothbart, 2003; Vonderlin, Ropeter, & Pauen, 2012), and a lab-internal questionnaire assessing demographic information as well as feeding and sleeping routines of the infant (One family, whose infant was assigned to the *Stranger odor* group, did not fill in the IBQ-R and the EPDS and is therefore not included in the control analyses with these two factors). After arriving in the laboratory, parents and infant were familiarized with the environment and parents were informed about the study and signed a consent form. The EEG recording was prepared while the infant was sitting on their parent's lap. For recording, we used an elastic cap (BrainCap, Easycap GmbH) in which 27 AgAgCl-electrodes were mounted according to the international 10-20-system. An additional electrode was attached below the infant's right eye to record the electrooculogram. The EEG signal was recorded with a sampling rate of 250 Hz using a BrainAmp amplifier and the BrainVision Recorder software (both Brain Products).

For the EEG recording, the infant was sitting in an age appropriate car seat (Maxi Cosi Pebble) positioned on the floor. The t-shirt was positioned over the chest area of the infant, folded along the vertical axis of the t-shirt and with the armpit region of the t-shirt directed towards the infant's face. The t-shirt was fixated using the



190 safety straps of the car seat as closely to the chin of the infant as possible and  
191 adjusted during the experiment if necessary.

192 In front of the infant (approximately 60 cm from the infant's feet), a 24-inch  
193 monitor with a refresh rate of 60 Hz was positioned at a height of about 40 cm  
194 (bottom edge of the screen). The parent was seated approximately 1.5 m behind  
195 the infant and instructed not to interact with the infant during the experiment.

196 The experiment was programmed using the Presentation software (Version 18.1).  
197 Faces were presented for 800 ms, preceded by a fixation cross presented for  
198 300 ms, and followed by an intertrial interval jittered between 800 and 1200 ms.  
199 The faces had a height of approximately 28 cm. If necessary, short video clips  
200 containing colorful moving shapes and ringtones were played during the  
201 experiment to redirect the infant's attention to the screen. Each infant saw a  
202 maximum of 216 trials, arranged in miniblocks of 24 trials containing 12 happy  
203 and 12 fearful faces and played consecutively without interruption. Trials were  
204 presented in a pseudorandomized order, ensuring that no stimulus category  
205 (happy, fearful) was repeated more than once. The experiment continued until the  
206 infant had seen all trials or became too fussy to continue the experiment. During  
207 the experiment, the infant was video-recorded using a small camera mounted on  
208 top of the monitor to offline exclude trials in which the infant did not attend to the  
209 screen.

210 *Data Analysis.* We analyzed the data using Matlab 2013b (The MathWorks, Inc.,  
211 Natick, MA), the Matlab toolbox FieldTrip (Oostenveld, Fries, Maris, & Schoffelen,  
212 2011), and for statistical analysis the package JASP (JASP Team, version 0.10.2).

213 *EEG Preprocessing.* For purposes of artefact removal including an independent  
214 component analysis (ICA) routine, all data were first referenced to the average of  
215 all electrodes (average reference), filtered using a 100-Hz lowpass and a 1-Hz  
216 highpass filter, and segmented into 1-sec-epochs. To detect epochs obviously  
217 contaminated by artifacts, the standard deviation was computed in a sliding  
218 window of 200 msec. If the standard deviation exceeds 100  $\mu$ V at any electrode,  
219 the entire epoch was discarded. Next, an independent component analysis (ICA)  
220 using the runica algorithm was computed on the remaining concatenated data.

221 Components were classified as artifactual based on visual inspection and rejected  
222 from the continuous, unfiltered data if classified as artefactual ( $4 \pm 2$  components  
223 per participants [mean  $\pm$  SD], range 0–10 components).

224 After removal of ICA components, the data was re-segmented into epochs ranging  
225 from 200 ms before to 800 ms after the onset of the stimulus, re-referenced to the  
226 linked mastoids (mean of TP9 and TP10), and a 0.2 to 20 Hz bandpass filter was  
227 applied. A last step of automatic artifact detection was applied, rejecting all epochs  
228 in which the standard deviation exceeded 80  $\mu$ V. Data was inspected visually for  
229 remaining artifacts, and all trials in which the infant did not attend to the screen  
230 (as assessed via the video recording during the experiment) were rejected (see  
231 Table 1 for number of remaining trials).

232 *ERP analysis.* To analyze the Nc response, we computed the mean response in a  
233 time-window of 400–800 ms after stimulus onset across frontocentral electrodes  
234 (F3, Fz, F4, C3, Cz, C4; see Supplementary Material for an analysis of occipital  
235 electrodes, where no significant effect was found). The data in the 200 ms  
236 preceding the stimulus onset were used as baseline. One participant was rejected  
237 from further analysis because the difference in the mean response to happy and  
238 fearful faces in this time-window and electrode cluster was more than 4 standard  
239 deviations from the mean across all other participants. Mean responses were  
240 entered into a repeated measures ANOVA with the within-subject factor Emotion  
241 (happy, fear) and the between-subject factor Odor (maternal, stranger, no odor).  
242 Furthermore, we included the infant's current breastfeeding status (whether s/he  
243 was still breastfed at the time of testing or not) as reported by the mother (Breastfed  
244 [yes,no]) as a covariate, as lactation may impact the mother's body odor  
245 (McClintock et al., 2005). Student's t-tests are computed as post-hoc tests and effect  
246 sizes are reported as partial eta squared ( $\eta_p^2$ ) and Cohen's *d*. In addition, we also  
247 performed the equivalent analysis using Bayesian statistics;  $BF_{10}$  values above 1  
248 are interpreted as anecdotal evidence, above 3 as moderate evidence, and above  
249 10 as strong evidence for the research hypothesis (Wagenmakers et al., 2018).

250 To further analyze the Emotion effect, we ran a cluster-based permutation test  
251 (Maris & Oostenveld, 2007). Importantly, such a test does not make any a priori  
252 assumptions regarding latency and topography of an effect, and therefore avoids

253 potential biases due to selection of specific ERP components or time windows. We  
254 therefore chose to run this additional analysis to confirm the effects found in the  
255 more traditional ERP analysis. We ran the test with 1000 permutations contrasting  
256 responses to happy and fearful faces separately for each *Odor* group. A cluster had  
257 to comprise at least 2 adjacent electrodes, was computed across time and electrode  
258 position, and a type-1-error probability of less than 0.05 at the cluster-level was  
259 ensured.

260 *Negative Affect*. Negative affect was computed as the mean of the IBQ-R scales  
261 Sadness, Fear, and Distress to Limitations (Aktar et al., 2018).

## 262 RESULTS

263 *Influence of maternal odor on the Nc response*. As predicted, we observed an overall  
264 enhanced Nc amplitude in response to fearful faces (significant main effect of  
265 Emotion [ $F(1,72) = 11.60, p = .001, \eta_p^2 = 0.14; BF_{10} = 2.578$ ]).

266 Most importantly, however, this emotion effect critically depended on the odor  
267 group an infant had been assigned to (significant interaction Emotion  $\times$  Odor  
268 [ $F(2,72) = 5.57, p = .006, \eta_p^2 = 0.13; BF_{10} = 4.564$ ; Figure 2]).

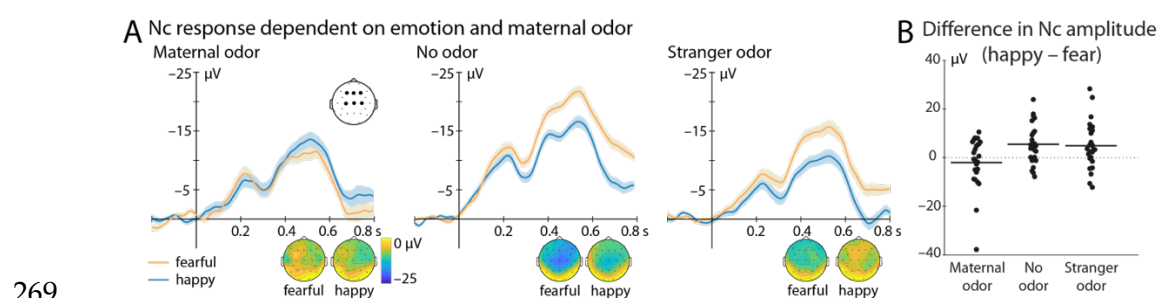

270 Figure 2. ERP response in the different odor groups. A) Shows the Nc response at frontocentral  
271 electrodes (F3, Fz, F4, C3, Cz, C4, marked by black dots) to fearful (orange) and happy (blue) facial  
272 expressions. While no difference in response was observed in the Maternal odor group, infants in  
273 the No odor and the Stranger odor group showed a significantly enhanced Nc response to fearful  
274 faces. Topographic representations averaged between 400 and 800 ms after face onset are shown at  
275 the bottom. B) Depicts the difference between Nc response to fearful and happy faces for each  
276 individual subject separately for the odor groups at the same electrodes and time window as in A.  
277 Mean difference is marked by horizontal black lines. Note that the interaction Odor  $\times$  Emotion is  
278 significant even when excluding the two participants with the largest difference between happy and  
279 fear in the Maternal odor group.

280 Follow-up tests confirmed that the Nc effect to fearful faces was critically absent  
281 in the *Maternal odor* group [ $t(24) = -0.95, p = .35, d = -.19$ ;  $BF_{10} = 0.32$ ; fearful:  $-6.51$   
282  $\pm 2.99 \mu V$ , happy:  $-8.53 \pm 3.17 \mu V$ ]. In contrast, the typical enhancement of the Nc  
283 response to fearful (compared to happy) faces was present in the *Stranger odor*  
284 group [ $t(24) = 2.51, p = .019, d = .50$ ;  $BF_{10} = 2.78$ ; fearful:  $-10.57 \pm 2.34 \mu V$  (mean  $\pm$   
285 SE), happy:  $-5.66 \pm 1.78 \mu V$ ] as well as in the *No odor* group [ $t(25) = 3.50, p = .002, d$   
286  $= .68$ ;  $BF_{10} = 21.02$ ; fearful:  $-16.94 \pm 2.19 \mu V$ , happy:  $-11.43 \pm 2.53 \mu V$ ].

287 *Corroborating analysis using a cluster-based permutation approach.* While the electrode  
288 and time window selection for this analysis had not been data derived but  
289 followed standards set by previous studies (Jessen & Grossmann, 2014, 2016, 2019),  
290 we aimed to corroborate this main result by a more data-driven search for potential  
291 effects using a cluster-based permutation test (Figure 3). In both, the *No odor* group  
292 and the *Stranger odor* group, nearly identical clusters indicating a significantly  
293 response enhancement to fearful (compared to happy) faces was found (No odor:  
294  $p = .006, T_{sum} = 3063.8$ ; Stranger odor:  $p = .021, T_{sum} = 1272.8$ ). Importantly, both  
295 clusters exhibit the latency and topographic distribution typical for an Nc  
296 response. Most importantly, no such cluster of significant differences was found  
297 in the *Maternal odor* group when contrasting responses to happy and fearful faces.

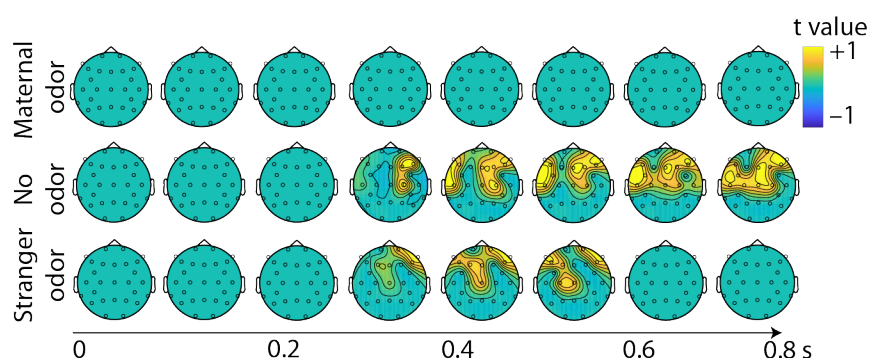

299 Figure 3. Cluster-based permutations test comparing responses to fearful and happy faces in the  
300 different odor groups. Depicted are topographic representations of *t*-values starting from the picture  
301 onset in steps of 100 ms.

302 Hence, while both control groups (*No group* and *Stranger odor* group) showed the  
303 age-typical enhanced Nc response to fearful faces, a heightened response to fearful  
304 faces was absent in the *Maternal odor* group. Our results suggest that maternal

305 odor, as a signal of familiarity and maternal presence, reduces infant's attention  
306 allocation to fear signals.

307 *No group differences with respect to potential confounds.* Importantly, we did not find  
308 a difference between the three groups with respect to a number of potential  
309 confounds: There were no group differences in the number of included trials per  
310 infant in either Emotion condition [happy:  $F(2,73) = 1.49, p = .23, BF_{10} = 0.355$  ;  
311 fearful:  $F(2,73) = 1.25, p = .29, BF_{10} = 0.296$ ]; age [ $F(2,73) = 0.49, p = .61, BF_{10} = 0.165$ ];  
312 no differences in maternal depression scores as assessed via the EPDS [ $F(2,72) =$   
313  $0.22, p = .80, BF_{10} = 0.136$ ]; nor in infant negative temperament as assessed via the  
314 IBQ-R [ $F(2,72) = 1.23, p = .30, BF_{10} = 0.294$ ].

315 *Effect of Breastfeeding.* A last finding supported our general line of reasoning.  
316 Namely, we did observe an interaction between Nc response to the emotional  
317 expression of the presented face and whether the infant was still breastfed or not  
318 [Emotion  $\times$  Breastfeeding,  $F(1,72) = 5.06, p = .028, \eta_p^2 = 0.07$ ;  $BF_{10} = 1.632$ ; Figure 4].  
319 Only the infants who were not breastfed any more at the time of testing showed  
320 an enhanced Nc response to fearful faces [ $t(30) = 3.55, p = .001, d = .64$ ;  $BF_{10} = 26.54$ ;  
321 fearful:  $-13.35 \pm 2.18 \mu V$ , happy:  $-7.90 \pm 2.00 \mu V$ ], while this enhancement was  
322 absent in the infants who were still breastfed [ $t(44) = 0.65, p = .52, d = 0.1$ ;  $BF_{10} =$   
323  $0.20$ ; fearful:  $-10.08 \pm 2.08 \mu V$ , happy:  $-9.05 \pm 2.10 \mu V$ ].

324 Importantly, this was independent of (i.e., additionally true but not interacting  
325 with) the *odor group* manipulation, as there was no meaningful Emotion  $\times$   
326 Breastfeeding  $\times$  Odor interaction [ $F(2,70) = 2.20, p = .12, \eta_p^2 = 0.06, BF_{10} = 1.081$ ].

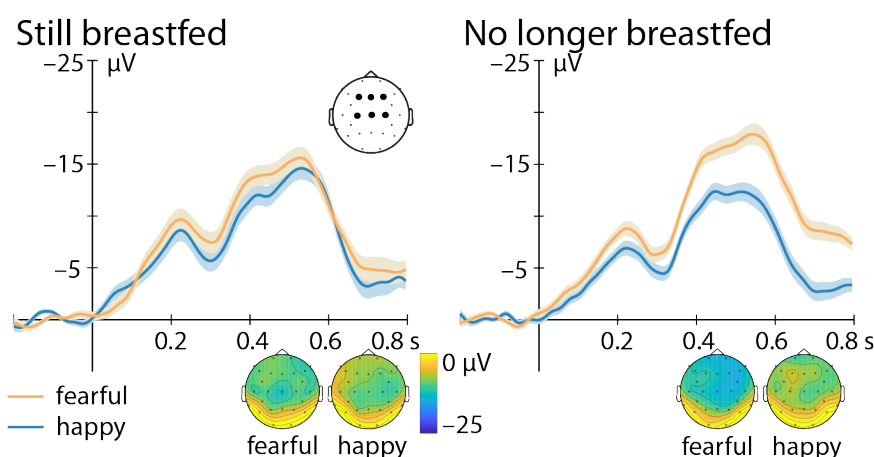

327

328 *Figure 4. Nc response depending on breastfeeding status. Nc response is depicted at frontocentral*  
 329 *electrodes (F3, Fz, F4, C3, Cz, C4, marked by black dots) to fearful (orange) and happy (blue) facial*  
 330 *expressions for infants who are still breastfed (left) and not breastfed anymore (right). Of the infants*  
 331 *not breastfed anymore, 9 had never been breastfed and the remaining 22 infants had been breastfed*  
 332 *for some time (on average for  $2.8 \pm 2.3$  months [mean  $\pm$  standard deviation] after birth). Infants who*  
 333 *are not breastfed any more show an enhanced Nc response to fearful faces, while this effect was*  
 334 *absent in the group of infants who were still breastfed. Topographic representations averaged*  
 335 *between 400 and 800 ms after face onset are shown at the bottom.*

## 336 DISCUSSION

337 Our results demonstrate that maternal odor is a sufficiently strong signal to reduce  
 338 the typically observed attentional response to fearful faces in 7-month-old infants.  
 339 A highly consonant effect was found for breastfeeding, suggesting that not only  
 340 momentary states but also longer-lasting effects related to maternal presence  
 341 impact responses to fear signals in infants.

342

### 343 *Maternal odor as a momentary modulator of infants' responses to signals of fear*

344 We suggest that such a response pattern might be characteristic for a developing  
 345 system that on the one hand needs to establish a close bonding to a caregiver,  
 346 typically the mother, while on the other hand learning to respond to potential  
 347 threat signals in the environment. This has been indirectly suggested by studies in  
 348 older children (Gee et al., 2014) as well as rodent research (Landers & Sullivan,  
 349 2012). Extending these lines of research, our findings provide evidence for flexible



350 processing of fear signals depending on maternal odor in early human  
351 development.

352 One potential interpretation of the observed pattern might be that a diminished  
353 response to threat signals in maternal presence (indicated via maternal odor) could  
354 facilitate bonding. Following this line of reasoning, a positive evaluation of  
355 information and less attention to potential negative signals may increase positive  
356 affect towards the caregiver even in the presence of negative signals. In addition,  
357 if maternal presence works as a “safety signal”, requiring the infant to allocate less  
358 attention to negative signals, this might also free cognitive capacities in the infant  
359 for other processes, akin to previously reported improved cognitive performance  
360 in rat pups in the presence of familiar odor (Wigal, Kucharski, & Spear, 1984).

361 Our results further underscore the importance of odor in early social development.  
362 Three recent studies have suggested a modulation of infant face processing in  
363 general by the presence of maternal odor (Durand et al., 2013, 2020; Leleu et al.,  
364 2019). Most importantly, Leleu et al (2019) found an enhanced neural response to  
365 faces in the presence of maternal odor. While their work thereby shows a  
366 modulation by maternal odor of face processing per se, the present result suggest  
367 that maternal odor can furthermore impact neural responses to specific aspects of  
368 face processing. Maternal odor might therefore be an important guiding factor in  
369 emotional learning in infancy.

370 Specifically, we found an impact on the attention-related Nc component (Conte et  
371 al., 2020; Webb et al., 2005) but no influence on early visual processing (see  
372 supplementary material) or on the number of trials the infants watched. Therefore,  
373 we found no evidence for a general impact of maternal odor on sensory processing  
374 or compliance with the experiment, but rather odor specifically impacted the  
375 evaluation of facial information, further underscoring its potential role in early  
376 social learning.

377 Importantly, the present manipulation did not differentiate between body odor  
378 and other odor components (such as deodorant used or specific food consumed by  
379 the mother), thereby reflecting the mélange of odors the infant experiences in  
380 maternal presence in everyday life. Hence, with the present approach, we cannot

381 assess whether the observed effect can be attributed to the mother's genuine body  
382 odor or rather to the overall familiar odor of the mother and the home  
383 environment. An extension of the present work separating these two potential  
384 sources – maternal body odor and overall familiar odor – may therefore provide  
385 interesting insights into the specificity of the current effect.

386 A further interesting factor in this context is parental proximity. As the infant  
387 grows more independent, detecting and responding to potential threat becomes of  
388 growing importance, especially if the mother is not present. At the same time, odor  
389 is a signal that is closely linked to parental proximity and/or familiar environment,  
390 hence the role of maternal odor during this period might be particularly  
391 interesting. Crucially, 7 months is an important turning point in early human  
392 development, characterized not only by qualitative changes in emotion  
393 development, but also by the onset of locomotion, an important step towards  
394 growing independence (Leppänen & Nelson, 2012). During this period, flexible  
395 responses to potential threats might be of particular importance, akin to what has  
396 been suggested in the rodent literature (Landers & Sullivan, 2012).

397 One important difference between the present study and most prior work on infant  
398 emotion perception is the positioning of the infant during the experiment; while  
399 the infants in the present study were seated in a car seat about 1.5 m apart from  
400 the parent, most other studies investigating infant emotion perception record data  
401 while the infant is sitting on their parent's lap, hence in direct physical contact with  
402 the parent (e.g., Jessen & Grossmann, 2015; Leppänen et al., 2007; Xie, McCormick,  
403 Westerlund, Bowman, & Nelson, 2018). It might therefore be of interest in future  
404 studies to systematically manipulate parental proximity, its potential impact on  
405 infant responses to emotional signals and on the role of maternal odor.

406

#### 407 *Breastfeeding as a long-term modulator of infants' responses to signals of fear*

408 While maternal odor as a situation-dependent or phasic signal influenced infants'  
409 responses to fearful faces, so did the more tonic variable of an infant's  
410 breastfeeding experience. Infants who were not breastfed any more at the time of  
411 the experiment did show the expected enhanced Nc response to fearful faces, while



this was not the case for the infants who were still breastfed. These findings are in line with prior studies reporting an increased bias towards expressions of happiness with increasing breastfeeding experience (Krol, Monakhov, Lai, Ebstein, & Grossmann, 2015; Krol et al., 2014). How exactly breastfeeding experience interacts with emotion processing is not certain, but a possible explanation is an increased closeness between mother and infants; breastfed infants on average spend more time interacting with their mother (Smith & Forrester, 2017) and show a higher attachment security (Gibbs, Forste, & Lybbert, 2018). However, such reasoning would go against prior work suggesting that an enhanced fear response at seven months is indicative of better attachment quality (Peltola, Forssman, Puura, van Ijzendoorn, & Leppänen, 2015; Peltola, van Ijzendoorn, & Yrttiaho, 2020). Hence, future studies systematically discerning breastfeeding experience from other variables related to mother-infant-interaction should assess the implications of this effect for socioemotional development.

In sum, our findings extend prior research suggesting an impact of breastfeeding experience on emotion processing in infancy. Factors related to maternal presence may therefore not only modulate responses to fearful faces directly, as suggested by the influence of maternal odor, but might also exert a longer-lasting impact.

### *Future Directions and Limitations*

While the present findings provide first evidence for an impact of maternal odor on emotion perception in infancy, future studies are clearly needed to further characterize the role its role in early social processing. Two important factors for future studies already mentioned are discerning maternal body odor from other types of familiar odor and the role of parental proximity (see above).

Another important aspect are potential changes across development. In rodents, it has been suggested that maternal presence, which can be signaled by maternal odor, may have a modulatory effect on offspring fear learning, in particular during the period in development when the offspring starts to spend increasing amounts of time away from their mother (for review, see Landers & Sullivan, 2012). One interesting approach for future studies is therefore the question whether a similar

443 pattern can be observed in humans: is there a specific time-window during which  
444 infants show flexible responses to fear signals depending on the presence, and by  
445 extension the odor, of their mother?

446 Interestingly, a prime candidate for such a time window might be around seven  
447 months of age, when infants not only start to discriminate emotional expressions  
448 but also for the first time acquire the ability to locomote (see e.g. Campos et al.,  
449 2000; Leppänen & Nelson, 2012). At the same time, while most studies report an  
450 onset of the fear-bias between 5 and 7 months of age, several recent studies point  
451 to a potential earlier onset (e.g. Bayet et al., 2017; Heck, Hock, White, Jubran, &  
452 Bhatt, 2016; Safar & Moulson, 2020). Furthermore, prior studies showing an impact  
453 of maternal odor on face processing investigated infants at 4 months of age  
454 (Durand et al., 2013, 2020; Leleu et al., 2019), showing that maternal odor  
455 influences face processing per se already at an earlier age than investigated here.  
456 Hence, tracing the impact of maternal odor on emotional face processing  
457 longitudinally may be a promising approach to further assess the interplay  
458 between both factors.

459 Finally, the generalizability to other types of signals needs to be assessed in future  
460 work. We show that maternal odor influences the age-typical attentional response  
461 to fearful faces (as indicated via the Nc response), which constitute a particular  
462 instance of negative social information. The first question that arises is whether  
463 maternal odor also impacts infants' responses to other negative but not necessarily  
464 social signals, such as pain or aversive sounds. Since recent studies suggest a link  
465 between maternal odor and the processing of faces in infancy (Durand et al., 2013;  
466 Leleu et al., 2019), one could also expect that this effect may be specific to social  
467 compared to non-social types of information.

468 At the same time, recent findings show that maternal odor can also impact the  
469 processing of facial identity (Durand et al., 2020), suggesting that maternal odor  
470 might impact different aspects of face processing beyond responses to facial  
471 emotional expressions. Future studies are needed to assess the robustness of the  
472 present findings in larger samples, and to test the generalizability to different types  
473 of social and non-social signals.

474

## 475 *Conclusions*

476 The current study demonstrates that maternal odor influences the brain response  
 477 to fearful facial expressions in infancy. While infants in two control groups of  
 478 different specificity (a different mother's odor or no specific odor at all) showed an  
 479 expectably enhanced attentional response to fear signals (as indicated via the Nc  
 480 amplitude), this response was absent in infants who could smell their mother. Our  
 481 results establish that the mother's presence, even if just signaled by the mother's  
 482 familiar odor, can result in a marked reduction of the neurobiological response to  
 483 fear signals in infants. Furthermore, our data provide evidence for the potency of  
 484 odor as a social signal in humans and in particular in early ontogeny.

485

## 486 *Acknowledgements*

487 This work was supported by funding of the German Research Foundation (DFG,  
 488 grant-number JE 781/1-1 & 2). We thank Leonie Emmerich and Aylin Ulubas for  
 489 help with the data acquisition, Jonas Obleser for helpful comments on the  
 490 manuscript, and all the families for participating.

491

# BIBLIOGRAPHY

- 493 Aktar, E., Mandell, D. J., de Vente, W., Majdandžić, M., Oort, F. J., van Renswoude, D. R.,  
494 ... Bögels, S. M. (2018). Parental negative emotions are related to behavioral and  
495 pupillary correlates of infants' attention to facial expressions of emotion. *Infant*  
496 *Behavior and Development*. <https://doi.org/10.1016/j.infbeh.2018.07.004>
- 497 Albers, C., & Lakens, D. (2018). When power analyses based on pilot data are biased:  
498 Inaccurate effect size estimators and follow-up bias. *Journal of Experimental Social*  
499 *Psychology*. <https://doi.org/10.1016/j.jesp.2017.09.004>
- 500 Bayet, L., Quinn, P. C., Laboissière, R., Caldara, R., Lee, K., & Pascalis, O. (2017). Fearful  
501 but not happy expressions boost face detection in human infants. *Proceedings of the*  
502 *Royal Society B: Biological Sciences*. <https://doi.org/10.1098/rspb.2017.1054>
- 503 Campos, J. J., Anderson, D. I., Barbu-Roth, M. A., Hubbard, E. M., Hertenstein, M. J., &  
504 Witherington, D. (2000). Travel broadens the mind. *Infancy*, 1(2), 149–219.
- 505 Conte, S., Richards, J. E., Guy, M. W., Xie, W., & Roberts, J. E. (2020). Face-sensitive brain  
506 responses in the first year of life. *NeuroImage*.  
507 <https://doi.org/10.1016/j.neuroimage.2020.116602>
- 508 Cox, J. L., Holden, J. M., & Sagovsky, R. (1987). Detection of postnatal depression.  
509 Development of the 10-item Edinburgh Postnatal Depression Scale. *British Journal of*  
510 *Psychiatry*, 150, 782–786. Retrieved from  
511 <http://www.ncbi.nlm.nih.gov/pubmed/3651732>
- 512 DeCasper, A. J., & Fifer, W. P. (1980). Of human bonding: newborns prefer their mothers'  
513 voices. *Science*, 208(4448), 1174–1176. Retrieved from  
514 <http://www.ncbi.nlm.nih.gov/pubmed/7375928>
- 515 Doucet, S., Soussignan, R., Sagot, P., & Schaal, B. (2007). The “smellscape” of mother's  
516 breast: Effects of odor masking and selective unmasking on neonatal arousal, oral,  
517 and visual responses. *Developmental Psychobiology*.  
518 <https://doi.org/10.1002/dev.20210>
- 519 Durand, K., Baudouin, J. Y., Lewkowicz, D. J., Goubet, N., & Schaal, B. (2013). Eye-  
520 Catching Odors: Olfaction Elicits Sustained Gazing to Faces and Eyes in 4-Month-  
521 Old Infants. *PLoS ONE*. <https://doi.org/10.1371/journal.pone.0070677>
- 522 Durand, K., Schaal, B., Goubet, N., Lewkowicz, D. J., & Baudouin, J. Y. (2020). Does any  
523 mother's body odor stimulate interest in mother's face in 4-month-old infants?

- 524 *Infancy*. <https://doi.org/10.1111/inf.12322>
- 525 Ebner, N. C., Riediger, M., & Lindenberger, U. (2010). FACES--a database of facial  
526 expressions in young, middle-aged, and older women and men: development and  
527 validation. *Behavior Research Methods*, 42(1), 351–362.  
528 <https://doi.org/10.3758/BRM.42.1.351>
- 529 Gartstein, M. A., & Rothbart, M. K. (2003). Studying infant temperament via the Revised  
530 Infant Behavior Questionnaire. *Infant Behavior and Development*, 26(1), 64–86.
- 531 Gee, D. G., Gabard-Durnam, L., Telzer, E. H., Humphreys, K. L., Goff, B., Shapiro, M., ...  
532 Tottenham, N. (2014). Maternal Buffering of Human Amygdala-Prefrontal Circuitry  
533 During Childhood but Not During Adolescence. *Psychological Science*.  
534 <https://doi.org/10.1177/0956797614550878>
- 535 Gibbs, B. G., Forste, R., & Lybbert, E. (2018). Breastfeeding, Parenting, and Infant  
536 Attachment Behaviors. *Maternal and Child Health Journal*.  
537 <https://doi.org/10.1007/s10995-018-2427-z>
- 538 Grossmann, T. (2010). The development of emotion perception in face and voice during  
539 infancy. *Restorative Neurology and Neuroscience*, 28, 236–291.
- 540 Heck, A., Hock, A., White, H., Jubran, R., & Bhatt, R. S. (2016). The development of  
541 attention to dynamic facial emotions. *Journal of Experimental Child Psychology*, 147,  
542 100–110. <https://doi.org/10.1016/j.jecp.2016.03.005>
- 543 Jessen, S., & Grossmann, T. (2014). Unconscious discrimination of social cues from eye  
544 whites in infants. *Proceedings of the National Academy of Sciences of the United States of*  
545 *America*, 111(45), 16208–16213. <https://doi.org/10.1073/pnas.1411333111>
- 546 Jessen, S., & Grossmann, T. (2015). Neural signatures of conscious and unconscious  
547 emotional face processing in human infants. *Cortex*, 64, 260–270.  
548 <https://doi.org/10.1016/j.cortex.2014.11.007>
- 549 Jessen, S., & Grossmann, T. (2016). The developmental emergence of unconscious fear  
550 processing from eyes during infancy. *Journal of Experimental Child Psychology*, 142,  
551 334–343. <https://doi.org/10.1016/j.jecp.2015.09.009>
- 552 Jessen, S., & Grossmann, T. (2017). Exploring the role of spatial frequency information  
553 during neural emotion processing in human infants. *Frontiers in Human*  
554 *Neuroscience*, 11. <https://doi.org/10.3389/fnhum.2017.00486>

- 555 Jessen, S., & Grossmann, T. (2019). Neural evidence for the subliminal processing of facial  
556 trustworthiness in infancy. *Neuropsychologia*, 126, 46–53.  
557 <https://doi.org/10.1016/j.neuropsychologia.2017.04.025>
- 558 Johnson, M. H., Dziurawiec, S., Ellis, H., & Morton, J. (1991). Newborns' preferential  
559 tracking of face-like stimuli and its subsequent decline. *Cognition*, 40(1–2), 1–19.  
560 Retrieved from <http://www.ncbi.nlm.nih.gov/pubmed/1786670>
- 561 Krol, K. M., Monakhov, M., Lai, P. S., Ebstein, R. P., & Grossmann, T. (2015). Genetic  
562 variation in CD38 and breastfeeding experience interact to impact infants' attention  
563 to social eye cues. *Proceedings of the National Academy of Sciences of the United States of*  
564 *America*, 112(39), E5434–42. <https://doi.org/10.1073/pnas.1506352112>
- 565 Krol, K. M., Rajhans, P., Missana, M., & Grossmann, T. (2014). Duration of exclusive  
566 breastfeeding is associated with differences in infants' brain responses to emotional  
567 body expressions. *Frontiers in Behavioral Neuroscience*, 8, 459.  
568 <https://doi.org/10.3389/fnbeh.2014.00459>
- 569 Landers, M. S., & Sullivan, R. M. (2012). The development and neurobiology of infant  
570 attachment and fear. *Developmental Neuroscience*, 34(2–3), 101–114.  
571 <https://doi.org/000336732>
- 572 Leleu, A., Rekow, D., Poncet, F., Schaal, B., Durand, K., Rossion, B., & Baudouin, J.-Y.  
573 (2019). Maternal odor shapes rapid face categorization in the infant brain. *Dev Sci*.  
574 Retrieved from <https://doi.org/10.1111/desc.12877>
- 575 Lenochova, P., Roberts, S. C., & Havlicek, J. (2009). Methods of human body odor  
576 sampling: the effect of freezing. *Chemical Senses*, 34(2), 127–138.  
577 <https://doi.org/10.1093/chemse/bjn067>
- 578 Leppänen, J. M., Moulson, M. C., Vogel-Farley, V. K., & Nelson, C. A. (2007). An ERP  
579 study of emotional face processing in the adult and infant brain. *Child Development*,  
580 78(1), 232–245. <https://doi.org/10.1111/j.1467-8624.2007.00994.x>
- 581 Leppänen, J. M., & Nelson, C. A. (2009). Tuning the developing brain to social signals of  
582 emotions. *Nature Reviews: Neuroscience*, 10, 37–47.
- 583 Leppänen, J. M., & Nelson, C. A. (2012). Early development of fear processing. *Current*  
584 *Directions in Psychological Science*, 21, 200–204.
- 585 Lubke, K. T., & Pause, B. M. (2015). Always follow your nose: the functional significance  
586 of social chemosignals in human reproduction and survival. *Hormones and Behavior*,

- 587 68, 134–144. <https://doi.org/10.1016/j.yhbeh.2014.10.001>
- 588 Maris, E., & Oostenveld, R. (2007). Nonparametric statistical testing of EEG- and MEG-  
589 data. *Journal of Neuroscience Methods*, 164(1), 177–190.
- 590 Marlier, L., & Schaal, B. (2005). Human newborns prefer human milk: Conspecific milk  
591 odor is attractive without postnatal exposure. *Child Development*.  
592 <https://doi.org/10.1111/j.1467-8624.2005.00836.x>
- 593 Martinos, M., Matheson, A., & de Haan, M. (2012). Links between infant temperament  
594 and neurophysiological measures of attention to happy and fearful faces. *Journal of*  
595 *Child Psychology and Psychiatry and Allied Disciplines*, 53(11), 1118–1127.  
596 <https://doi.org/10.1111/j.1469-7610.2012.02599.x>
- 597 McClintock, M. K., Bullivant, S., Jacob, S., Spencer, N., Zelano, B., & Ober, C. (2005).  
598 Human body scents: Conscious perceptions and biological effects. In *Chemical*  
599 *Senses*. <https://doi.org/10.1093/chemse/bjh151>
- 600 Miguel, H. O., McCormick, S. A., Westerlund, A., & Nelson, C. A. (2019). Rapid face  
601 processing for positive and negative emotions in 5-, 7-, and 12-month-old infants:  
602 An exploratory study. *British Journal of Developmental Psychology*.  
603 <https://doi.org/10.1111/bjdp.12288>
- 604 Nishitani, S., Miyamura, T., Tagawa, M., Sumi, M., Takase, R., Doi, H., ... Shinohara, K.  
605 (2009). The calming effect of a maternal breast milk odor on the human newborn  
606 infant. *Neuroscience Research*. <https://doi.org/10.1016/j.neures.2008.10.007>
- 607 Oostenveld, R., Fries, P., Maris, E., & Schoffelen, J.-M. (2011). FieldTrip: Open source  
608 software for advanced analysis of MEG, EEG, and invasive electrophysiological  
609 data. *Computational Intelligence and Neuroscience*, 2011, 156869.
- 610 Peltola, M. J., Forssman, L., Puura, K., van Ijzendoorn, M. H., & Leppänen, J. M. (2015).  
611 Attention to Faces Expressing Negative Emotion at 7 Months Predicts Attachment  
612 Security at 14 Months. *Child Development*. <https://doi.org/10.1111/cdev.12380>
- 613 Peltola, M. J., Hietanen, J. K., Forssman, L., & Leppänen, J. M. (2013). The emergence and  
614 stability of the attentional bias to fearful faces in infancy. *Infancy*, 18(6), 905–926.
- 615 Peltola, M. J., Leppänen, J. M., Mäki, S., & Hietanen, J. K. (2009). Emergence of enhanced  
616 attention to fearful faces between 5 and 7 months of age. *Social Cognitive and*  
617 *Affective Neuroscience*, 4, 134–142.



- 618 Peltola, M. J., van IJzendoorn, M. H., & Yrttiaho, S. (2020). Attachment security and  
619 cortical responses to fearful faces in infants. *Attachment and Human Development*.  
620 <https://doi.org/10.1080/14616734.2018.1530684>
- 621 Porter, R. H., Makin, J. W., Davis, L. B., & Christensen, K. M. (1992). Breast-fed infants  
622 respond to olfactory cues from their own mother and unfamiliar lactating females.  
623 *Infant Behavior & Development*, 15, 85–93.
- 624 Riggins, T., & Scott, L. S. (2019). P300 development from infancy to adolescence.  
625 *Psychophysiology*. <https://doi.org/10.1111/psyp.13346>
- 626 Russell, M. J. (1976). Human olfactory communication. *Nature*, 260(5551), 520–522.  
627 Retrieved from <http://www.ncbi.nlm.nih.gov/pubmed/1264204>
- 628 Safar, K., & Moulson, M. C. (2020). Three-month-old infants show enhanced behavioral  
629 and neural sensitivity to fearful faces. *Developmental Cognitive Neuroscience*.  
630 <https://doi.org/10.1016/j.dcn.2020.100759>
- 631 Smith, J. P., & Forrester, R. (2017). Maternal Time Use and Nurturing: Analysis of the  
632 Association between Breastfeeding Practice and Time Spent Interacting with Baby.  
633 *Breastfeeding Medicine*. <https://doi.org/10.1089/bfm.2016.0118>
- 634 Sullivan, R. M., & Toubas, P. (1998). Clinical usefulness of maternal odor in newborns:  
635 soothing and feeding preparatory responses. *Biology of the Neonate*, 74(6), 402–408.  
636 Retrieved from <http://www.ncbi.nlm.nih.gov/pubmed/9784631>
- 637 Vaish, A., Grossmann, T., & Woodward, A. (2008). Not all emotions are created equal: the  
638 negativity bias in social-emotional development. *Psychological Bulletin*, 134(3), 383–  
639 403. <https://doi.org/10.1037/0033-2909.134.3.383>
- 640 Varendi, H., Porter, R. H., & Winberg, J. (1994). Does the newborn baby find the nipple  
641 by smell? *Lancet*, 344(8928), 989–990. Retrieved from  
642 <http://www.ncbi.nlm.nih.gov/pubmed/7934434>
- 643 Vonderlin, E., Ropeter, A., & Pauen, S. (2012). Erfassung des fruehkindlichen  
644 Temperaments mit dem Infant Behavior Questionnaire Revised. Psychometrische  
645 Merkmale einer deutschen Version. *Zeitschrift Fuer Kinder- Und Jugendpsychiatrie  
646 Und Psychotherapie*, 40(5), 307–314.
- 647 Wagenmakers, E. J., Marsman, M., Jamil, T., Ly, A., Verhagen, J., Love, J., ... Morey, R. D.  
648 (2018). Bayesian inference for psychology. Part I: Theoretical advantages and  
649 practical ramifications. *Psychonomic Bulletin and Review*.



650        <https://doi.org/10.3758/s13423-017-1343-3>

651        Webb, S. J., Long, J. D., & Nelson, C. A. (2005). A longitudinal investigation of visual  
652        event-related potentials in the first year of life. *Dev Sci*, 8(6), 605–616.  
653        <https://doi.org/10.1111/j.1467-7687.2005.00452.x>

654        Wigal, T., Kucharski, D., & Spear, N. E. (1984). Familiar contextual odors promote  
655        discrimination learning in preweanling but not in older rats. *Developmental*  
656        *Psychobiology*. <https://doi.org/10.1002/dev.420170512>

657        Xie, W., McCormick, S. A., Westerlund, A., Bowman, L. C., & Nelson, C. A. (2018). Neural  
658        correlates of facial emotion processing in infancy. *Developmental Science*.  
659        <https://doi.org/10.1111/desc.12758>

660        Zhang, S., Su, F., Li, J., & Chen, W. (2018). The Analgesic Effects of Maternal Milk Odor  
661        on Newborns: A Meta-Analysis. *Breastfeeding Medicine*.  
662        <https://doi.org/10.1089/bfm.2017.0226>

663
